# Supplementary material for: Fatty Acid and Lipopolysaccharide Effect on Beta Cells Proteostasis and its Impact on Insulin Secretion
Source: MDPI journal article supplement (doi:10.3390/cells8080884), 2019-08-13

### Supplementary figures

**Sup. Fig. 1.** LPS treatment increases the signal of DBP-PA on endoplasmic reticulum. Confocal images of  $\beta$ -cells treated with BDP-PA (**A**), ER-tracker probe (**B**) and merge (**C**). Under the same conditions,  $\beta$ -cells treated with BDP-PA plus LPS (**D**), ER-tracker plus LPS (**E**), and the merge (**F**). Bars correspond to 20  $\mu$ m.

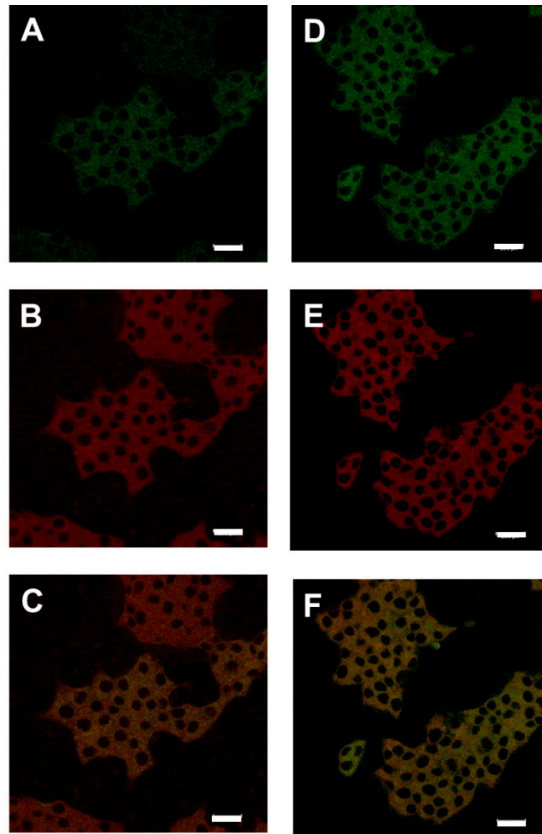

**Sup. Fig. 2.** Activation of UPR arms induced by PA treatment (300  $\mu$ M). Tunicamycin (2  $\mu$ g/mL) was employed as a control of UPR activation.  $\beta$ -actin was used as a loading control.

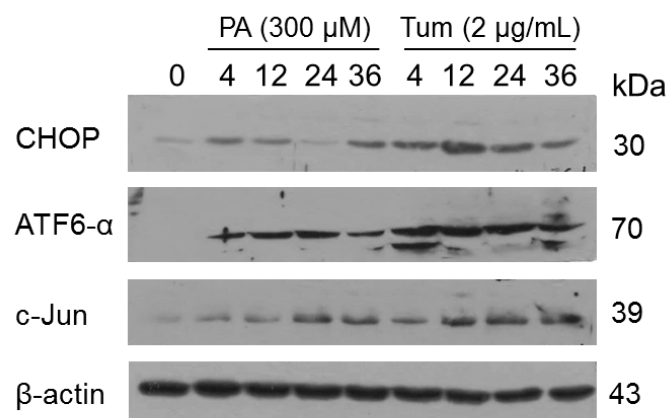

**Sup. Fig. 3.** Full western-blot of XBP1s, c-Jun, and ATF6 $\alpha$  under LPS increasing concentrations (0.1 1000 ng/mL).  $\beta$ -actin was used as a loading control.

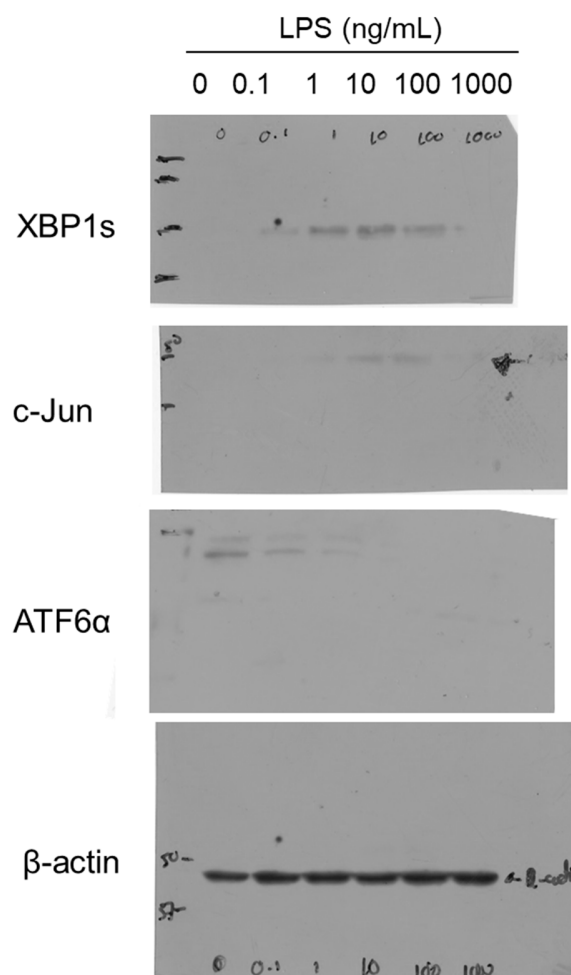

**Sup. Fig. 4.** Full western blot of PMCA1/4 under different conditions of treatment with stearic acid, oleic acid and LPS.

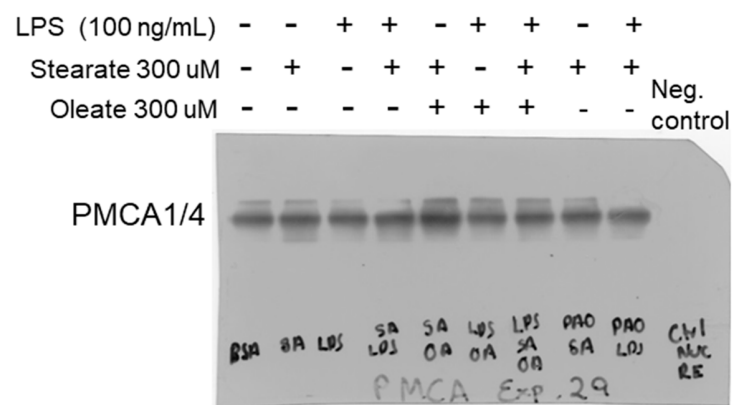

Supplement: s1 [file s1]
